# Supplementary material for: High performance graphene oxide/polyacrylonitrile composite pervaporation membranes for desalination applications
Source: Royal Society of Chemistry journal article supplement (doi:10.1039/c4ta06573e), 2015-01-01
Supplement: c4ta06573e1.pdf [file c4ta06573e1.pdf]

## Supporting Information

High performance graphene oxide/polyacrylonitrile composite  
pervaporation membranes for desalination applications

Bin Liang<sup>a,†</sup>, Wu Zhan<sup>a,†</sup>, Genggeng Qi<sup>b</sup>, Sengseng Lin<sup>a</sup>, Qian Nan<sup>a</sup>, Yuxuan Liu<sup>a</sup>, Bing Cao<sup>a,\*</sup>  
and Kai Pan<sup>a,\*</sup>

\* Corresponding authors:

pankai@mail.buct.edu.cn (Kai Pan); bcao@mail.buct.edu.cn (Bing Cao)

<sup>a</sup> Key laboratory of carbon fiber and functional polymers, Ministry of Education, Beijing  
University of Chemical Technology, Beijing 100029, China

<sup>b</sup> Department of Materials Science and Engineering, Cornell University, Ithaca, NY, USA

### Preparation of GO aqueous suspensions

Graphite powder was mixed with  $\text{H}_2\text{SO}_4$ ,  $\text{K}_2\text{S}_2\text{O}_8$ , and  $\text{P}_2\text{O}_5$ . The mixture was kept at  $80\text{ }^\circ\text{C}$  for 4.5 h. Distilled water was added for dilution which was followed by filtration, washing, and drying.  $\text{H}_2\text{SO}_4$  and  $\text{KMnO}_4$  were slowly added to the pretreated graphite in an ice bath. The mixture was reacted at  $35\text{ }^\circ\text{C}$  for 2 h, and distilled water was added for hydrolysis. After 2 h, 30%  $\text{H}_2\text{O}_2$  was added to the mixture. The mixture was allowed to stand for at least 12 h, after which the clear supernatant was decanted. The remaining precipitate was washed with 5% HCl solution and washed again with distilled water. The final solution was centrifuged and ultrasonicated for 4 h. The concentration of the obtained GO was 1.23 g/L.

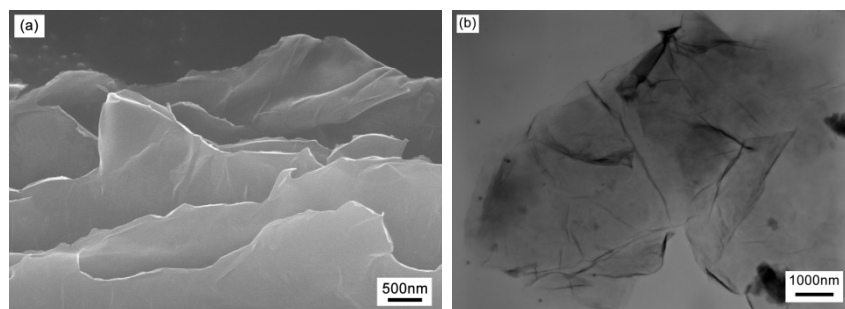

**Fig. 1S** (a) SEM and (b) TEM morphology of the GO sample.

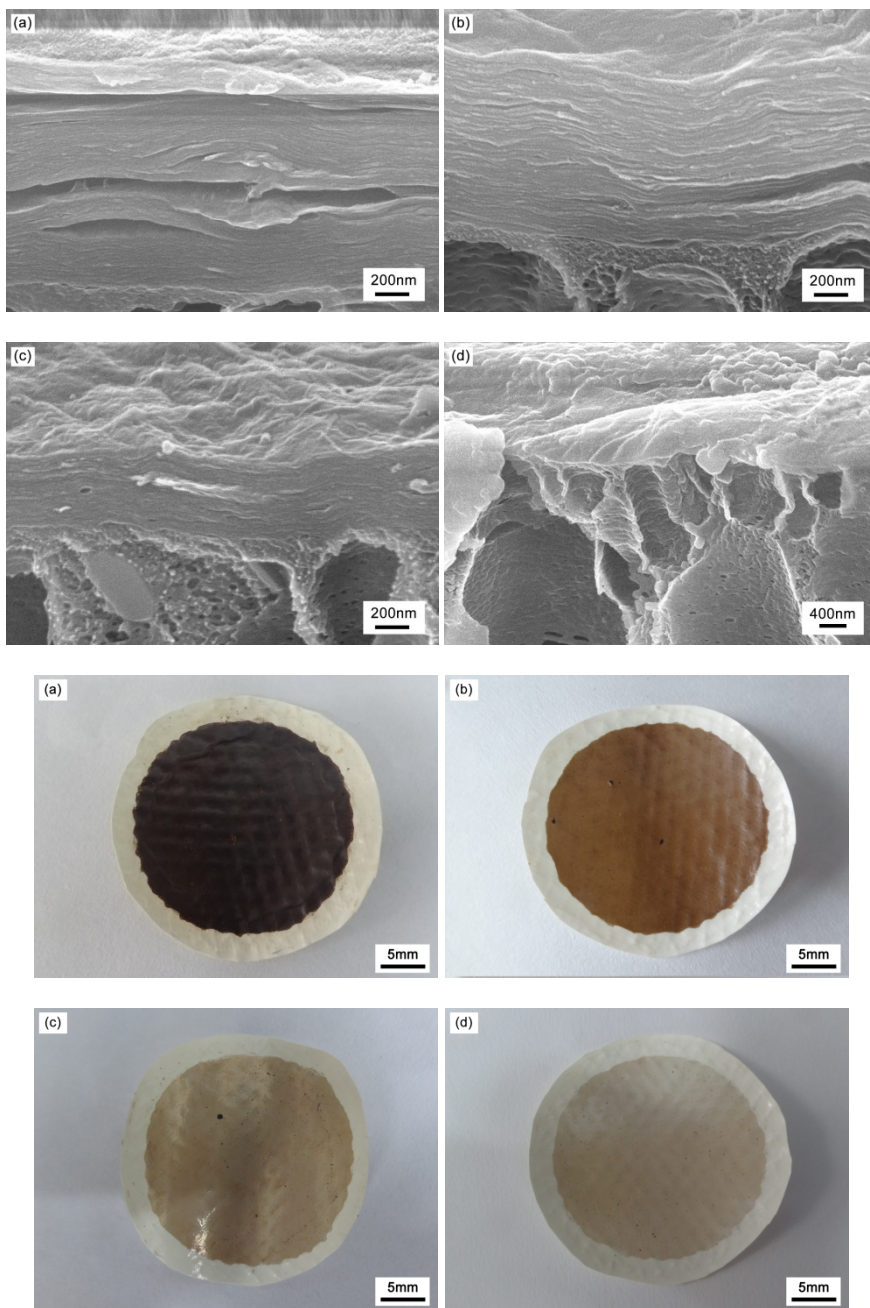

**Fig. S2** The GO film thickness increases linearly with the specific GO deposition

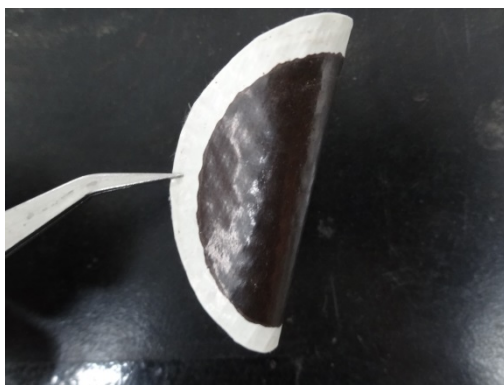

Fig. S3 Digital photo of folding GO/PAN composite membrane

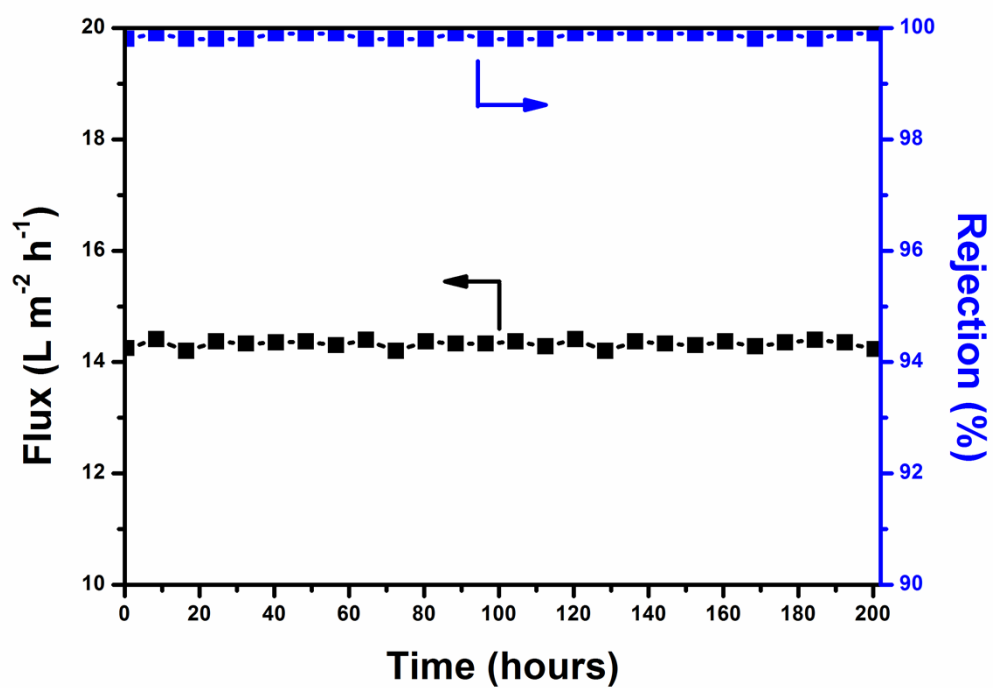

Fig. S4 the long-term stability of the composite membrane with 35,000 ppm NaCl solution at 30 °C.
